# Supplementary material
Source: HighWire-hosted journal article supplement (https://jnm.snmjournals.org/highwire/filestream/104233/field_highwire_adjunct_files/2/261926_Supplemental_Tables.pdf)
Supplement: 261926_Supplemental_Tables.pdf [file 261926_Supplemental_Tables.pdf]

**SUPPLEMENTAL TABLE 1.**

| Baseline characteristics               | N (%)    | First line | Second/third line | P-value |
|----------------------------------------|----------|------------|-------------------|---------|
| Median age, years                      | 67.0     | 67.0       | 66.5              | 0.93    |
| Sex                                    |          |            |                   | 0.93    |
| Male                                   | 7 (58.3) | 3 (60.0)   | 4 (57.1)          |         |
| Female                                 | 5 (41.7) | 2 (40.0)   | 3 (42.9)          |         |
| WHO performance status                 |          |            |                   | 0.69    |
| 0                                      | 4 (33.3) | 2 (40.0)   | 2 (28.6)          |         |
| 1                                      | 8 (66.7) | 3 (60.0)   | 5 (71.4)          |         |
| Tumor PD-L1 expression                 |          |            |                   | 0.020   |
| <1 %                                   | 4 (33.3) | 0          | 4 (57.1)          |         |
| 1-49 %                                 | 3 (25.0) | 1 (20.0)   | 2 (28.6)          |         |
| >50%                                   | 5 (41.7) | 4 (80.0)   | 1 (14.3)          |         |
| PD-1 expression                        |          |            |                   | 0.015   |
| IC0                                    | 3 (25.0) | 0          | 3 (42.9)          |         |
| IC1                                    | 4 (33.3) | 1 (20.0)   | 3 (42.9)          |         |
| IC2                                    | 2 (16.7) | 1 (20.0)   | 1 (14.3)          |         |
| IC3                                    | 3 (25.0) | 3 (60.0)   | 0                 |         |
| Number of previous anticancer regimens |          |            |                   | 0.002   |
| 0                                      | 5 (41.7) | 5 (100)    | 0                 |         |
| 1                                      | 5 (41.7) | 0          | 5 (71.4)          |         |
| 2                                      | 2 (16.7) | 0          | 2 (28.6)          |         |

**Patient baseline characteristics.** WHO world health organization; PD-L1 programmed death-ligand 1; PD-1 programmed cell death protein 1; IC immune score according to SP142

**SUPPLEMENTAL TABLE 2.**

|                   | <b>Adverse events</b>                                                               |
|-------------------|-------------------------------------------------------------------------------------|
| <b>Patient 1</b>  | Fatigue grade I<br>Anorexia grade I<br>Atelectasis grade II                         |
| <b>Patient 2</b>  | Fatigue grade I<br>Anorexia grade I<br>Dyspnea grade II                             |
| <b>Patient 3</b>  | Fatigue grade II<br>Anorexia grade II<br>Dizziness grade I<br>Constipation grade II |
| <b>Patient 4</b>  | Dyspnea grade I                                                                     |
| <b>Patient 5</b>  | None                                                                                |
| <b>Patient 6</b>  | None                                                                                |
| <b>Patient 7</b>  | Anemia grade III                                                                    |
| <b>Patient 8</b>  | Cough grade I<br>Productive cough grade II                                          |
| <b>Patient 9</b>  | Non cardiac chest pain grade II                                                     |
| <b>Patient 10</b> | Fatigue grade I                                                                     |
| <b>Patient 11</b> | None                                                                                |
| <b>Patient 12</b> | Myalgia grade III                                                                   |

**Adverse events per patient.**

**SUPPLEMENTAL TABLE 3.**

|                   |                  | First imaging acquisition |       |            | Second imaging acquisition |        |              |
|-------------------|------------------|---------------------------|-------|------------|----------------------------|--------|--------------|
|                   |                  | Day 3                     | Day 5 | Day 6 or 7 | Day 14 or 15               | Day 17 | Day 18 or 19 |
| <b>Patient 1</b>  | primary tumor    | 0.11                      | 0.13  | 0.13       | 0.13                       | 0.16   | 0.23         |
| <b>Patient 2</b>  | primary tumor    | 0.05                      | 0.05  | 0.07       | BLQ                        | 0.07   | 0.07         |
|                   | lymph node       | 0.06                      | 0.06  | 0.06       | BLQ                        | BLQ    | BLQ          |
| <b>Patient 3</b>  | primary tumor    | 0.08                      | 0.08  | 0.09       | NP                         | 0.07   | 0.07         |
|                   | bone metastasis  | 0.08                      | 0.08  | 0.10       | NP                         | 0.07   | 0.07         |
|                   | bone metastasis  | 0.02                      | 0.03  | 0.04       | NP                         | 0.04   | 0.04         |
| <b>Patient 4</b>  | primary tumor    | 0.18                      | NP    | 0.21       | 0.14                       | NP     | 0.20         |
| <b>Patient 5</b>  | primary tumor    | 0.13                      | NP    | 0.14       | 0.14                       | NP     | 0.17         |
|                   | lung metastasis  | 0.12                      | NP    | 0.14       | 0.15                       | NP     | 0.16         |
| <b>Patient 6</b>  | brain metastasis | 0.05                      | NP    | 0.07       | NP                         | NP     | NP           |
|                   | lymph node       | 0.13                      | NP    | 0.12       | NP                         | NP     | NP           |
| <b>Patient 7</b>  | primary tumor    | 0.10                      | NP    | 0.08       | 0.08                       | NP     | NP           |
|                   | bone metastasis  | 0.05                      | NP    | 0.07       | 0.04                       | NP     | NP           |
|                   | bone metastasis  | 0.08                      | NP    | 0.08       | 0.05                       | NP     | NP           |
|                   | lymph node       | 0.08                      | NP    | 0.06       | 0.06                       | NP     | NP           |
|                   | soft tissue      | 0.16                      | NP    | 0.11       | 0.06                       | NP     | NP           |
|                   | bone metastasis  | 0.06                      | NP    | 0.06       | 0.05                       | NP     | NP           |
|                   | soft tissue      | 0.09                      | NP    | 0.07       | 0.05                       | NP     | NP           |
|                   | soft tissue      | 0.09                      | NP    | 0.06       | 0.05                       | NP     | NP           |
|                   | bone metastasis  | 0.08                      | NP    | 0.09       | 0.05                       | NP     | NP           |
|                   | bone metastasis  | 0.09                      | NP    | 0.10       | 0.05                       | NP     | NP           |
|                   | bone metastasis  | 0.05                      | NP    | 0.10       | 0.05                       | NP     | NP           |
|                   | soft tissue      | 0.15                      | NP    | 0.13       | 0.07                       | NP     | NP           |
|                   | soft tissue      | 0.14                      | NP    | 0.13       | 0.07                       | NP     | NP           |
| <b>Patient 8</b>  | primary tumor    | 0.18                      | NP    | 0.22       | 0.24                       | NP     | 0.27         |
| <b>Patient 9</b>  | primary tumor    | 0.05                      | NP    | 0.06       | BLQ                        | NP     | 0.07         |
| <b>Patient 10</b> | brain metastasis | 0.03                      | NP    | 0.05       | 0.05                       | NP     | 0.06         |
|                   | bone metastasis  | 0.06                      | NP    | 0.08       | BLQ                        | NP     | BLQ          |
|                   | bone metastasis  | 0.08                      | NP    | 0.09       | BLQ                        | NP     | BLQ          |
|                   | bone metastasis  | 0.04                      | NP    | 0.07       | BLQ                        | NP     | BLQ          |
|                   | bone metastasis  | 0.08                      | NP    | 0.09       | BLQ                        | NP     | BLQ          |
| <b>Patient 11</b> | primary tumor    | 0.08                      | NP    | 0.08       | 0.11                       | NP     | 0.14         |
|                   | lymph node       | 0.10                      | NP    | 0.11       | BLQ                        | NP     | BLQ          |
| <b>Patient 12</b> | soft tissue      | BLQ                       | NP    | 0.08       | BLQ                        | NP     | BLQ          |

**%ID/gr for all lesions and time points after first and second <sup>89</sup>Zr-pembrolizumab injection.**

BLQ below quantification limit; NP not performed.

**SUPPLEMENTAL TABLE 4.**

| <b>Patient</b>    | <b>Number of brain metastases ≤10 mm</b> | <b>Number of brain metastases &gt;10 mm but ≤20 mm</b> | <b>Number of brain metastases &gt;20 mm (number)</b> | <b>Number of irradiated brain metastases</b> | <b>Number of visible brain metastases on <sup>89</sup>Zr-pembrolizumab</b> |
|-------------------|------------------------------------------|--------------------------------------------------------|------------------------------------------------------|----------------------------------------------|----------------------------------------------------------------------------|
| <i>Patient 1</i>  | 5                                        |                                                        |                                                      | 5                                            | 0                                                                          |
| <i>Patient 2</i>  | 8                                        | 2                                                      | 2                                                    | 12                                           | 0                                                                          |
| <i>Patient 6</i>  |                                          |                                                        | 1                                                    | 1                                            | 1                                                                          |
| <i>Patient 10</i> | 13                                       | 6                                                      | 1                                                    | 0                                            | 2                                                                          |

**Brain metastases.** Information of all brain metastases in participants and visualization on <sup>89</sup>Zr-pembrolizumab PET/CT.

**SUPPLEMENTAL TABLE 5.**

| <b>Patient</b> | <b>PD-L1 expression (%)</b> | <b>PD-1 expression</b> | <b>SUVpeak day 6/7</b> |
|----------------|-----------------------------|------------------------|------------------------|
| 1              | 0                           | IC2                    | 8.8                    |
| 2              | 20                          | IC2                    | 6.4                    |
| 3              | 1                           | IC0                    | 6.0                    |
| 4              | 0                           | IC1                    | 15.2                   |
| 5              | 80                          | IC3                    | 12.5                   |
| 6              | 0                           | IC0                    | BLQ                    |
| 7              | 75                          | IC3                    | 7.0                    |
| 8              | 90                          | IC3                    | BLQ                    |
| 9              | 0                           | IC0                    | BLQ                    |
| 10             | 30                          | IC1                    | BLQ                    |
| 11             | 60                          | IC1                    | 7.4                    |
| 12             | 60                          | IC1                    | BLQ                    |

**SUVpeak and immunohistochemistry.** Characteristics of each biopsied lesion including PD-L1 expression, PD-1 expression and SUVpeak on day 6 or 7.

PD-L1 programmed death-ligand 1; PD-1 programmed cell death protein 1; SUV standardized uptake value; BLQ below limit of quantification.
